1 **Title**

2 Metabolic mechanisms of nitrogen substrate utilisation in three rhizosphere bacterial strains  
3 investigated using quantitative proteomics

4

5 **Authors**

6 Richard P. Jacoby#, Antonella Succurro\* and Stanislav Kopriva

7

8 **Affiliations**

9 University of Cologne, Botanical Institute and Cluster of Excellence on Plant Sciences  
10 (CEPLAS), D-50674 Cologne, Germany

11

12 \* Current address: Life and Medical Sciences Institute and West German Genome Center,  
13 University of Bonn, D-53115 Bonn, Germany

14

15 **Correspondence:**

16 # Richard Jacoby

17 University of Cologne, Botanical Institute and CEPLAS

18 Zùlpicher Str. 47b

19 50674 Cologne, Germany

20 Phone: +49-221-4707308

21 Email: [rjacoby@uni-koeln.de](mailto:rjacoby@uni-koeln.de)

22 **Running title**

23 Proteomics of nitrogen metabolism in rhizosphere bacteria

24

25 **Key words**

26 Nitrogen; Bacteria; Metabolism; Amino acids; Proteomics; Mass spectrometry; Rhizosphere

27 microbiome; Bacterial root microbiota; Flux balance analysis; Phenotype microarray

28

29 **Day of submission**

30 03.05.2019

31

32 **Word counts**

33 Body text: 6833, Abstract: 239, Importance: 149

34

35 **Number of body figures**

36 6

37

38 **Number of body tables**

39 1

40

41 **Number of supplementary figures**

42 8

43

44 **Number of supplementary tables**

45 15

46 **Abstract**

47 Nitrogen metabolism in the rhizosphere microbiome plays an important role in mediating plant  
48 nutrition, particularly under low inputs of mineral fertilisers. However, there is relatively little  
49 mechanistic information about which genes and metabolic pathways are induced by rhizosphere  
50 bacterial strains to utilise diverse nitrogen substrates. Here we investigate nitrogen substrate  
51 utilisation in three taxonomically diverse bacterial strains previously isolated from Arabidopsis  
52 roots. The three strains represent taxa that are consistently detected as core members of the plant  
53 microbiome: *Pseudomonas*, *Streptomyces* and *Rhizobium*. We use phenotype microarrays to  
54 determine the nitrogen substrate preferences of these strains, and compare the experimental  
55 results versus computational simulations of genome-scale metabolic network models obtained  
56 with EnsembleFBA. Results show that all three strains exhibit generalistic nitrogen substrate  
57 preferences, with substrate utilisation being well predicted by EnsembleFBA. Using label-free  
58 quantitative proteomics, we document hundreds of proteins in each strain that exhibit differential  
59 abundance values following cultivation on five different nitrogen sources: ammonium, glutamate,  
60 lysine, serine and urea. Proteomic data show that the three strains use different metabolic  
61 strategies to utilise specific nitrogen sources. One diverging trait appears to be their degree of  
62 proteomic flexibility, with *Pseudomonas* sp. *Root9* utilising lysine nutrition via widespread  
63 protein-level alterations to its flexible metabolic network, whereas *Rhizobium* sp. *Root491* shows  
64 relatively stable proteome composition across diverse nitrogen sources. Our results give new  
65 protein-level information about the specific transporters and enzymes induced by diverse  
66 rhizosphere bacterial strains to utilise organic nitrogen substrates.

67

68 **Importance**

69 Nitrogen is the primary macronutrient required for plant growth. In contemporary agriculture, the  
70 vast majority of nitrogen is delivered via mineral fertilisers, which have undesirable  
71 environmental consequences such as waterway eutrophication and greenhouse gas production.  
72 There is increasing research interest in designing agricultural systems that mimic natural  
73 ecosystems, where nitrogen compounds are cycled between plants and soil, with the  
74 mineralisation of recalcitrant soil organic-N molecules mediated via microbial metabolism.  
75 However, to date there is little mechanistic information about which genes and metabolic  
76 pathways are induced by rhizosphere bacterial strains to metabolise organic-N molecules. Here,  
77 we use quantitative proteomics to provide new information about the molecular mechanisms  
78 utilised by taxonomically diverse rhizosphere bacterial strains to utilise different nitrogen  
79 substrates. Furthermore, we generate computational models of bacterial metabolism from a  
80 minimal set of experimental information, providing a workflow that can be easily reused to  
81 predict nitrogen substrate utilisation in other strains.

82

## 83 **Introduction**

84 Improved nitrogen management in agricultural systems is crucial for environmental  
85 sustainability. Large-scale application of mineral nitrogen fertilisers has extensive off-target  
86 effects, such as greenhouse gas production and waterway eutrophication (1). One potential  
87 pathway to boost agricultural sustainability involves substituting mineral fertilisers with organic  
88 nutrients derived from recycling various waste streams. For low-input agricultural systems to  
89 provide sufficient bioavailable nitrogen to meet the demands of plant growth, future crop  
90 management practices will need to better incorporate microbial pathways of nitrogen  
91 mobilisation (2). One specific suggestion involves engineering the rhizosphere microbiome to  
92 promote the mineralisation of organic nitrogen, coupled with engineering of plant root  
93 metabolism to release rhizodeposits that recruit beneficial microbial strains (3). However, the  
94 ability to manipulate plant-microbe cooperation is limited by an incomplete knowledge of the  
95 specific microbial traits involved in root colonisation and nutrient mobilisation (4).

96

97 Nitrogen flows in the rhizosphere are complex, with plants and microbes potentially cooperating  
98 but sometimes competing for uptake of diverse nitrogen molecules (5). Legume-Rhizobia  
99 symbioses provide an example of cooperation, whereby the majority of the plant's nitrogen  
100 nutrition is derived from bacterial fixation of atmospheric N<sub>2</sub> (6). Outside of legumes, it is  
101 generally accepted that plants obtain the majority of their nitrogen nutrition from inorganic forms  
102 such as NO<sub>3</sub> and NH<sub>4</sub>, whereas microbes are more adept at acquiring more recalcitrant organic  
103 nitrogen forms such as proteins and amino acids (7). Therefore, cooperative nutrient transfers can  
104 occur when microbes take up soil-bound organic nitrogen, which is subsequently transferred to  
105 plants in a mineralised form following microbial lysis or protozoic predation (8). Conversely,  
106 competitive flows can occur when microbes immobilise inorganic nitrogen, or when plants take

107 up organic nitrogen (9). Adding further complexity, plant root exudates contain large amounts of  
108 organic nitrogen molecules which can serve as carbon and nitrogen substrates for bacterial  
109 growth. The rate of amino acid release from plant roots increases under exposure to specific  
110 bacterial metabolites (10), but organic nitrogen molecules released via root exudation can also be  
111 efficiently re-acquired by the root system (11).

112  
113 Investigations of how bacteria utilise diverse nitrogen substrates have been documented since the  
114 beginning of modern microbiology (12). Ammonium is the preferred nitrogen source for most  
115 bacteria, and experimental designs usually include ammonium as a control treatment, to compare  
116 against alternative nitrogen sources or starvation treatments (13). Over decades, such studies have  
117 provided detailed insight into fundamental physiological mechanisms such as the molecular  
118 pathways of bacterial nitrogen assimilation, the perception of nitrogen status, and the response to  
119 nitrogen starvation in *E. coli* (14). However, other bacterial taxa possess different mechanisms  
120 for regulating nitrogen metabolism (15, 16), with soil bacteria exhibiting extensive diversity  
121 regarding their nitrogen substrate preferences and also the metabolic pathways used to metabolise  
122 organic nitrogen sources (17, 18). Therefore, novel insights into metabolic mechanisms of  
123 nitrogen metabolism may be observed by studying nitrogen substrate utilisation in taxonomically  
124 diverse bacterial strains isolated from the rhizosphere.

125  
126 The rhizosphere microbiome has attracted increasing research attention over the past 20 years.  
127 From the results of 16S pyrosequencing studies, it has become increasingly apparent that the  
128 rhizosphere hosts a taxonomically diverse bacterial microbiota, which plays an important role in  
129 determining plant growth and health (19). Recently, multiple research groups have established  
130 large collections of bacterial strains isolated from field-grown plants, which can be used to

131 dissect the functional traits carried out by individual strains, or reassembled into synthetic  
132 communities that recapitulate microbiome function (20, 21). There is now an opportunity to study  
133 these plant-associated microbial strains using high-throughput ‘omics techniques, to acquire new  
134 insights into the specific molecular mechanisms that confer a selective advantage in the plant-  
135 associated niche (22).

136

137 Alongside experimental approaches, computational modelling is becoming a widespread  
138 approach to investigate microbial metabolism (23). One particularly useful method is the  
139 construction of genome-scale metabolic network models, which translate the information  
140 encoded in the bacterial genome into a computational formalism that can be analysed with  
141 mathematical methods (24). However, curated genome-scale metabolic models are only available  
142 for a relatively small set of extensively studied bacterial strains, and generally it is difficult to  
143 analyse newly sequenced bacterial strains using computational modelling. This limitation exists  
144 because reconstructing a curated genome-scale metabolic network model is a painstaking process  
145 that requires extensive manual curation as well as the acquisition of devoted experimental data,  
146 particularly regarding biomass composition. Although progress is being made towards automated  
147 reconstruction of genome-scale metabolic network models, many challenges still have to be  
148 addressed (25). Recently, a method named EnsembleFBA has been proposed as a potential  
149 approach to approximate genome-scale metabolic networks for diverse bacterial strains. Instead  
150 of relying on the availability of a single manually curated genome-scale model, EnsembleFBA  
151 uses the information derived from multiple metabolic networks, which are reconstructed from the  
152 same initial draft network and refined through the process of positive and negative gapfilling on  
153 randomized sets of growth and non-growth conditions (26). As a proof of concept, it was shown

154 that the EnsembleFBA method achieved greater precision in predicting essential genes than an  
155 individual, highly curated model.

156

157 Here we investigate nitrogen metabolism in three taxonomically diverse bacterial strains  
158 previously isolated from Arabidopsis roots. We apply a combination of methods, including  
159 quantitative proteomics, growth assays, phenotype microarray and EnsembleFBA. With the  
160 proteomic data, we were particularly interested in determining the specific proteins that are  
161 enriched according to different nitrogen sources, to decipher the metabolic strategies used for  
162 nitrogen acquisition across different rhizosphere bacterial strains. In parallel, we applied the  
163 EnsembleFBA method to reconstruct and analyse sets of genome-scale metabolic network  
164 models for each strain, using the phenotype microarray data for training and testing the model  
165 predictions of nitrogen substrate utilisation.

166



167 **Results**

168 We studied nitrogen metabolism in three taxonomically diverse bacterial strains isolated from  
169 roots of field-grown *Arabidopsis*: *Pseudomonas* sp. *Root9*, *Streptomyces* sp. *Root66D1* and  
170 *Rhizobium* sp. *Root491*. Strains were previously isolated in Bai et al (20), and the three strains  
171 chosen here correspond to taxa that were repeatedly observed to be highly abundant in the  
172 microbiome of field-grown *Arabidopsis* plants (20, 27, 28).

173

174 ***Measurement and modelling of growth phenotypes on different nitrogen sources***

175 First, we investigated each strain's ability to utilise 94 diverse nitrogen sources using a phenotype  
176 microarray (BIOLOG PM3B) (Supplementary Figure 1, Supplementary Table S1). The data  
177 reveal that all three strains can catabolise a relatively high number of substrates, with the three  
178 strains exhibiting positive growth phenotypes on 55-61 of the 94 substrates tested. This indicates  
179 that all three strains have generalistic nitrogen substrate preferences, which has been previously  
180 suggested to be a selective advantage in the rhizosphere (29). In parallel, we used EnsembleFBA  
181 (26) to test how accurately nitrogen substrate utilisation can be computationally predicted across  
182 the three strains (Supplementary Figure 1, Supplementary Table S1). When nitrogen substrate  
183 utilisation is assessed in binary terms (growth versus no growth), there is a good concordance  
184 between the experimental results and the computational predictions, with Ensemble FBA  
185 showing an accuracy in predicting growth in about 78% of cases for the three strains  
186 (Supplementary Table S2). However, there is a relatively poor correlation between the proxy  
187 values of metabolic activity predicted by the models versus the experimental measurements, with  
188 a comparison of percentile rank between the datasets yielding  $r^2$  values between 0.23 and 0.5  
189 across the three strains (Supplementary Figure S2). Interestingly, the accuracy of the model

190 prediction seems to vary across different molecular classes, with good concordance for amino  
191 acids but poor concordance for nitrogen bases (Figure 1).

192

### 193 ***Growth curves in batch culture***

194 We conducted growth curves in batch culture to further investigate the growth phenotypes of  
195 these three strains when cultivated on five selected nitrogen sources (ammonium, glutamate,  
196 lysine, serine and urea), (Figure 2, Supplementary Table S3). The rationale for selecting these  
197 nitrogen sources is because ammonium serves as the inorganic reference, the three chosen amino  
198 acids are abundant in soils and exhibit diverse charges (glutamate negative, lysine positive, serine  
199 neutral), and urea is a widely applied agricultural fertiliser. Nitrogen concentration in the medium  
200 was 5 mM, which was determined to be a yield-limiting nitrogen concentration in all three strains  
201 (30), (Supplementary Figure S3). In *Pseudomonas* sp. *Root9*, we see that lysine nutrition elicits a  
202 long extension of the lag phase (Figure 2A), perhaps indicative of a physiological reprogramming  
203 that must occur before rapid proliferation can proceed (31). In contrast, *Rhizobium* sp. *Root491*  
204 exhibited very similar growth curves across all five nitrogen sources, indicative of growth  
205 homeostasis across different nutrient sources.

206

### 207 ***Proteome remodelling in response to different nitrogen sources***

208 The main aim of this study was to define systems-level differences in cellular proteome  
209 composition in three rhizosphere bacterial strains cultivated on five different nitrogen sources.  
210 Therefore, bacteria were cultivated on the same nitrogen sources shown in Figure 2 (ammonium,  
211 glutamate, lysine, serine and urea), cells were harvested during the exponential growth phase, and  
212 cellular protein composition analysed using label-free quantitative proteomics. A numerical  
213 summary of protein IDs is shown in Table 1, a visual overview of the derived results is shown in

214 Figure 3, volcano plots for all 10 pairwise comparisons across all three strains are shown in  
215 Supplementary Figures S4-S6, and the MaxQuant abundance values for all detected proteins are  
216 given in Supplementary Table S4.

217  
218 Comparing protein composition across the three strains, it seems that *Pseudomonas* sp. *Root9*  
219 exhibits more protein-level flexibility compared to the other two strains. This is evident in the  
220 PCAs and heatmaps presented in Figure 3, which show that lysine treatment of *Pseudomonas* sp.  
221 *Root9* elicits a large proteomic remodelling compared to the other four nitrogen treatments,  
222 characterised by hundreds of differentially expressed proteins. In contrast, we see that *Rhizobium*  
223 sp. *Root491* exhibits a degree of proteomic homeostasis across the different nitrogen treatments,  
224 as shown by the closer clustering of the PCA data points and the lower number of differentially  
225 expressed proteins in this strain.

226  
227 Comparing across the five different nitrogen sources, we see that each individual nitrogen source  
228 seems to elicit a differential proteomic impact in the three different strains. For example, lysine  
229 nutrition elicits large-scale changes in the proteome of *Pseudomonas* sp. *Root9*, yet relatively few  
230 proteomic changes in the other two studied strains. In both *Streptomyces* sp. *Root66D1* and  
231 *Rhizobium* sp. *Root491*, urea nutrition elicited no proteomic changes compared to ammonium,  
232 whereas in *Pseudomonas* sp. *Root9* there were over 100 proteins with differential abundance  
233 values between ammonium versus urea (Supplementary Figures S4-S6).

234  
235 ***Orthologous proteins and metabolic pathways modulated by nitrogen nutrition***

236 To allow inter-strain comparisons of the label-free quantitative proteomic data acquired from the  
237 three taxonomically diverse rhizosphere bacterial strains, we utilised cross-species gene

238 annotation via KEGG orthologues (32). We selected individual proteins that represent the 495  
239 KEGG orthologues which were detected in all five treatments across all three strains, and  
240 visualise the abundance of these representative orthologues using a heatmap and PCAs in Figure  
241 4, with numerical data provided in Supplementary Table S5. As can be seen in Figure 4A and 4B,  
242 the samples group together according to the three bacterial strains rather than the five nitrogen  
243 sources. This indicates that the baseline differences in strain-specific proteome composition are  
244 much greater than any treatment-induced differences elicited by nitrogen nutrition. In Figure 4C  
245 we plot a PCA of these 495 KEGG orthologues when protein abundance in the four organic  
246 nitrogen sources is normalised versus the inorganic nitrogen source ammonium. This shows that  
247 lysine nutrition in *Pseudomonas* sp. *Root9* elicits a proteomic response that is qualitatively  
248 different compared to the strain-medium combinations profiled in this study.

249  
250 Our next step was to analyse which specific KEGG pathways were modulated according to  
251 nitrogen treatment in the three strains. In Figure 5, we show the results of Fisher's exact test to  
252 determine whether the constituent proteins of 30 KEGG pathways exhibited altered abundance  
253 profiles in the 10 pairwise comparisons between different nitrogen sources. Numerical data for all  
254 126 tested pathways compared is provided in Supplementary Table S6. Looking at the specific  
255 pathways modulated by nitrogen nutrition across the three strains, it seems that *Rhizobium* sp.  
256 *Root491* undergoes fewer alterations to KEGG pathways related to metabolism, but instead  
257 exhibits extensive modulation to pathways related to environmental processing and motility. For  
258 *Pseudomonas* sp. *Root9* and *Streptomyces* sp. *Root66D1*, we see that many of the pairwise  
259 comparisons are characterised by widespread modulation to all KEGG pathways, indicating that  
260 extensive proteome remodelling has taken place between the different nitrogen sources.

261

262 Next, we compared the metabolic flux distributions outputted from EnsembleFBA versus the  
263 differentially expressed proteins identified in the quantitative proteomic datasets (Supplementary  
264 Tables S7-S13). To visualise how nitrogen source affects protein abundance and computationally  
265 predicted fluxes, we used the Interactive Pathway Explorer to map KEGG orthologues and  
266 reactions onto the KEGG map ‘Metabolic Pathways’ (33). Visualisations for each of the three  
267 amino acid treatments (glutamate, lysine and serine) in pairwise comparisons versus ammonium  
268 were produced for both the proteomic data (Supplemental Figure S7) and also the computational  
269 modelling data (Supplemental Figure S8). Overall, it is evident that a similar set of metabolic  
270 pathways have been mapped in both the experimental and computational approaches, with good  
271 coverage of glycolysis, TCA cycle, and amino acid metabolism. However, there is relatively little  
272 concordance between the differentially regulated metabolic steps identified by the proteomics  
273 data versus the differentially regulated fluxes outputted by EnsembleFBA. For instance, the  
274 proteomic data show that lysine nutrition elicits significant modifications to lipid metabolism in  
275 *Pseudomonas* sp. *Root9*, whereas many of the reaction steps in lipid metabolism are absent from  
276 the EnsembleFBA flux distributions. This difference could derive from a known limitations of  
277 genome-scale modelling approaches such as EnsembleFBA, because we used a generic biomass  
278 function to construct the models, which does not account for variations in bacterial lipid  
279 composition between genotypes and treatments (34). Therefore, improved model accuracy  
280 probably requires condition-specific measurement of microbial biomass composition.

281

### 282 ***Proteins correlated to the PII protein of the nitrogen stress response***

283 Analysing the quantitative proteomics data, we noticed that the different nitrogen sources often  
284 elicited changes in the abundance of proteins involved in the well-characterised nitrogen stress  
285 response, such as GlnK (PII protein), amtB (ammonium transporter) and GlnA (glutamine

286 synthetase) (14). Therefore, we postulated that our dataset may allow us to discover new proteins  
287 that are regulatory targets of the nitrogen stress response in less studied bacterial taxa. We first  
288 analysed the abundance of PII, a well characterised protein of the nitrogen stress response that  
289 exhibited significantly different abundance values between certain nitrogen treatments in all three  
290 strains (Figure 6A). Next, we assessed which other proteins in the dataset were correlated to PII  
291 in terms of protein abundance, by plotting their correlation against PII on the x-axis and the slope  
292 of this correlation on the y-axis (Figure 6B, numerical data in Supplementary Table S14). These  
293 analyses show that *Rhizobium* sp. *Root491* shows the highest nitrogen stress response under these  
294 nitrogen treatments, with all three amino acid treatments leading to dramatic increases in the  
295 abundance of the PII protein, and also with many more proteins positively correlated to PII  
296 abundance in *Rhizobium* sp. *Root491* compared to the other two strains. Looking at the identity  
297 of proteins whose abundance was correlated to PII in *Rhizobium* sp. *Root491*, we see that 10  
298 proteins controlled by the *exo* operon that conduct the synthesis and export of extracellular  
299 polysaccharides are positively correlated to PII abundance (Supplementary Table S14).  
300 Analogous findings have been reported via genetic manipulation of *V. vulnificus* and *S. meliloti*,  
301 with knockout of nitrogen stress response elements *NtrC* and *NtrX* resulting in reduced  
302 production of extracellular polysaccharides (35, 36). In *Pseudomonas* sp. *Root9*, the data point  
303 that exhibits a strong negative correlation to PII is an NADP-dependent glutamate dehydrogenase  
304 (Supplementary Table S14), previously shown to be a target of *NtrC*-driven transcriptional  
305 repression in *P. putida* (37).

306

307 **Discussion**

308 Differential nitrogen treatments are a classical experimental manipulation in microbiology, but  
309 the majority of molecular knowledge about bacterial nitrogen metabolism has been acquired in *E.*  
310 *coli* (14). To deepen our knowledge of nitrogen metabolism in the rhizosphere microbiome, this  
311 study analyses nitrogen substrate utilisation in three taxonomically diverse bacterial strains  
312 previously isolated from field-grown *Arabidopsis* roots (20). The three strains represent taxa that  
313 are consistently detected as core members of the plant microbiome: *Pseudomonas*, *Streptomyces*  
314 and *Rhizobium* (21). Using label-free quantitative proteomics, we document hundreds of proteins  
315 in each strain that exhibit differential abundance values between nitrogen sources. To enable  
316 protein-level comparisons between these taxonomically diverse strains, we integrate the  
317 identified proteins using KEGG Orthologues, and map the differential expression of orthologous  
318 proteins onto metabolic maps to determine which specific metabolic pathways are modulated by  
319 nitrogen source at the protein level. We also determine novel proteins linked to the nitrogen stress  
320 response in these three strains, by investigating which proteins display abundance values that are  
321 positively and negatively correlated to the PII signal transduction protein. Furthermore, we  
322 integrate experimental data with computational models, using the EnsembleFBA method to test  
323 how accurately metabolic phenotypes can be computationally predicted from a minimal set of  
324 experimental data. Our results show that the three strains exhibit diverse metabolic responses to  
325 different nitrogen nutrition regimes, with a summary of key results presented in Supplementary  
326 Table S15.

327  
328 One noticeable observation in our quantitative proteomic dataset is that the three different  
329 bacterial strains exhibit widely divergent protein-level responses to the same nitrogen source.  
330 This is best illustrated in the pairwise comparisons of protein composition between two nitrogen

331 sources, which yield dramatic variation in the number of differentially expressed proteins across  
332 the three strains. For example, the ammonium versus serine pairwise comparison resulted in only  
333 eight DEPs for *Pseudomonas* sp. *Root9*, but 74 DEPs in *Streptomyces* sp. *Root66D1* and 100  
334 DEPs in *Rhizobium* sp. *Root491*. Reciprocal responses were observed for pairwise comparisons  
335 between ammonium versus lysine nutrition, which elicited widespread alterations to the proteome  
336 of *Pseudomonas* sp. *Root9* but relatively fewer protein-level changes in the other two studied  
337 strains. One potential explanation for this difference is that the minimally responsive strains  
338 induce enzymes that can convert these different nitrogen sources into ammonium via relatively  
339 simple metabolic pathways. For *Pseudomonas* sp. *Root9*, one of the few proteins induced under  
340 serine nutrition is serine dehydratase, which yields ammonium in one enzymatic step, along with  
341 pyruvate that can be quickly assimilated in the TCA cycle. In contrast, the other two studied  
342 strains exhibited no upregulation of their serine dehydratase proteins under serine nutrition,  
343 potentially indicating the assimilated serine must be distributed through multiple elements of the  
344 metabolic network requiring a wider modulation of protein expression. For lysine, our proteomics  
345 data indicate that lysine degradation in *Pseudomonas* sp. *Root9* proceeds via the  $\delta$ -aminovalerate  
346 pathway, whereas *Rhizobium* sp. *Root491* appears to utilise the saccharopine pathway of lysine  
347 degradation. Although both of these pathways yield relatively similar products and contain a  
348 similar number of enzymatic steps, our data indicate that the operation of the  $\delta$ -aminovalerate  
349 pathway in *Pseudomonas* sp. *Root9* could require a dramatic remodelling of cellular protein  
350 composition, and a much longer lag phase before cell proliferation can begin. In contrast,  
351 *Rhizobium* sp. *Root491* shows almost identical growth curves on lysine and ammonium, and the  
352 relatively small set of proteins modulated by lysine nutrition contains a high proportion of  
353 transporters. Although both strains exhibit generalistic nitrogen substrate preferences, the  
354 contrasting proteomic impact of lysine nutrition indicates that *Pseudomonas* sp. *Root9*



355 metabolises diverse substrates by adapting its highly flexible metabolic network, whereas  
356 *Rhizobium* sp. *Root491* utilises different transport mechanisms to assimilate diverse nitrogen  
357 sources into a relatively stable metabolic network.

358

359 There is a longstanding appreciation that amino acids play a significant role in the nutrition of  
360 rhizosphere bacterial strains (38). Amino acids are an important component of the soil nitrogen  
361 cycle, derived from diverse sources such as depolymerisation of soil bound protein and also from  
362 plant rhizodeposition (18). Microbial metabolism of amino acids in the rhizosphere is related to  
363 plant productivity, because microbial mineralisation of organic nitrogen can boost plant nutrition  
364 (39), while the microbial uptake of amino acids is one mechanism used by plants to recruit  
365 specific strains into the rhizosphere microbiome (40). The data presented here could potentially  
366 assist future efforts to manipulate the rhizosphere microbiome for altered metabolism of amino  
367 acids. For instance, our data in *Pseudomonas* sp. *Root9* implicate serine dehydratase as an  
368 important protein for degradation of serine, and measurements in *Rhizobium* sp. *Root491* position  
369 saccharopine dehydrogenase as important for degradation of lysine. Perhaps bacterial strains with  
370 high activities of these two enzymes could be recruited to the rhizosphere to promote faster rates  
371 of amino acid mineralisation. In *Rhizobium* sp. *Root491*, we document that this strain grows  
372 quickly on three chemically diverse amino acids, and also that dozens of ABC transporter  
373 proteins exhibit altered abundance values under amino acid nutrition. Previous work in *E. coli*  
374 has shown amino acids such as glutamate and arginine serve as poor sole nitrogen sources for  
375 enteric bacteria, with this phenotype being underpinned by slow rates of amino acid transport and  
376 catabolism (41). Perhaps the protein network that undertakes amino acid transport and catabolism  
377 in *Rhizobium* sp. *Root491* could serve as a template for engineering other bacterial strains to  
378 grow rapidly on amino acids as a sole nitrogen source. In *Streptomyces* sp. *Root66D1*, amino acid

379 nutrition results in upregulation of dozens of proteins, but very few of these are classically  
380 recognised as being involved in amino acid degradation. Compared to other bacterial taxa, there  
381 is generally less knowledge about nitrogen metabolism in Gram-positive *Streptomyces* (16), so  
382 the uncharacterised proteins shown to be differentially expressed under amino acid nutrition in  
383 *Streptomyces* sp. *Root66D1* could be targets for future studies investigating their biochemical  
384 function.

385  
386 Urea is the most widely applied agricultural fertiliser globally, but plant nutrition experiments  
387 show that urea is a relatively poor sole nitrogen source for plant growth (42). Although plants can  
388 uptake urea to some degree, a large proportion of the nitrogen delivered via urea fertilisers must  
389 first undergo hydrolysis by microbial metabolism before it can subsequently contribute to plant  
390 nutrition (43). Therefore, urea metabolism in the rhizosphere microbiome is a potential target for  
391 improving agricultural nitrogen use efficiency. In our work, we show that all three tested strains  
392 can grow rapidly on urea as a sole nitrogen source. However, the proteomic impact of urea  
393 nutrition differed widely between the three strains, with *Streptomyces* sp. *Root66D1* and  
394 *Rhizobium* sp. *Root491* both showing zero proteins that were differentially expressed between  
395 ammonium versus urea treatment, whereas this comparison in *Pseudomonas* sp. *Root9* elicited  
396 126 differentially expressed proteins. The urease enzyme that converts urea to ammonium is  
397 required under normal conditions for catabolism of purine and arginine, and is increasingly  
398 expressed under nitrogen stress as a nutrient salvage mechanism. In our dataset, all three strains  
399 exhibit high expression of urease subunits under all conditions tested, and our investigations of  
400 the nitrogen stress response showed that many urease subunits are tightly correlated to PII  
401 expression. For all three strains, we see that at least one amino acid treatment actually elicits a  
402 higher urease expression compared to urea nutrition. This suggests that urease abundance is not

403 the limiting factor for utilisation of urea as a sole nitrogen source, and that other mechanisms may  
404 explain urea-induced proteome remodelling in *Pseudomonas* sp. *Root9*. Inspecting the data, we  
405 see many transporter proteins are differentially expressed in *Pseudomonas* sp. *Root9* under urea  
406 versus ammonium nutrition, which may be involved in urea uptake or the excretion of urea-  
407 derived waste products. In comparison, the transport machineries of both *Streptomyces* sp.  
408 *Root66D1* and *Rhizobium* sp. *Root491* seem to already be primed for urea uptake when cultivated  
409 on ammonium. Future studies could investigate how to optimally coordinate urea transport and  
410 metabolism between plants and rhizosphere microbes to deliver higher nitrogen use efficiency  
411 from urea fertilisers.

412  
413 Many microbial strains have been labelled as plant growth promoting, but there is relatively little  
414 knowledge about the genes and mechanisms that underpin this trait (44). In previous work,  
415 *Rhizobium* sp. *Root491* was characterised as a plant growth promoting bacterium by its ability to  
416 increase *Arabidopsis* root length in co-cultivation experiments (45). Furthermore,  
417 exometabolomics profiling has shown that *Rhizobium* sp. *Root491* can consume a wide variety of  
418 plant-derived metabolites as carbon substrates (46). Here, we show that *Rhizobium* sp. *Root491*  
419 exhibits fast growth on a variety of nitrogen sources, that its set of ABC transporters exhibit  
420 differential abundance values in response to nitrogen source, and also that amino acid nutrition  
421 induces the expression of multiple proteins involved in the production of extracellular  
422 polysaccharides. When combined with previous observations of *Rhizobium* sp. *Root491*, we can  
423 begin to characterise the functional traits possessed by this strain that contribute to plant growth  
424 promotion, such as: recruitment to the rhizosphere via the consumption of plant root metabolites,  
425 adherence to the root surface via biofilm production in the presence of plant-derived amino acids,  
426 and the potential for mineralisation of diverse nitrogen molecules to fuel plant nutrition.

427 Potentially, future studies could predict whether other rhizosphere strains can also promote plant  
428 growth via similar mechanisms, by investigating genetic similarities with *Rhizobium* sp. *Root491*.  
429 Also, future work could investigate whether plant genotypes differ in their ability to attract  
430 growth-promoting strains to the rhizosphere, and how to design synthetic microbial communities  
431 that combine multiple growth-promoting strains.

432  
433 There is increasing interest in combining experimental and computational approaches to analyse  
434 microbial metabolism, with the long-term goal of quantitatively predicting the behaviour of  
435 microbial communities (47). Metabolic modelling is rapidly progressing as a powerful  
436 computational tool to explore the metabolic capacities of bacteria. However, the main limitation  
437 that prevents modelling approaches from being applied to diverse bacterial strains is the need to  
438 obtain a highly curated genome-scale metabolic model for each strain of interest. This process of  
439 model curation still requires a significant amount of manual inspection and relies heavily on  
440 accurate genome annotation (25). In the present study, we used EnsembleFBA (26) to produce  
441 metabolic models for three diverse bacterial strains using a minimal set of experimental  
442 information. We compared the derived models versus experimental data by assessing how  
443 accurately they can predict growth phenotypes and proteome remodelling across different  
444 nitrogen sources. This showed that EnsembleFBA gives relatively accurate predictions of  
445 nitrogen substrate utilisation, with binary phenotypes (growth versus no growth) correctly  
446 predicted in around 80% of cases. However, there was only an intermediate correlation between  
447 the proxy values of metabolic activity predicted by the model versus the experimentally acquired  
448 measurements ( $r^2$ : 0.23-0.50), and a relatively poor concordance between the differential fluxes  
449 predicted by the model versus the differentially expressed proteins identified via proteomics. We  
450 present two potential interpretations for these inaccurate predictions. First, there is no

451 straightforward relationship between enzymatic flux and protein abundance, because the catalysis  
452 rate of many enzymes is not only regulated via abundance but also by other factors including  
453 post-translational modifications, allosteric regulators or the relative concentrations of substrates  
454 and products (48). Second, our models used the same biomass definition that Biggs and Papin  
455 used for their EnsembleFBA analyses of *Pseudomonas* and *Streptococcus* (26). Although efforts  
456 have been made to define a general biomass composition for bacteria (49), inaccuracies of this  
457 definition can decrease the predictive power of metabolic models. Therefore, one potential  
458 pathway to improve model accuracy would involve measuring the biomass composition for all  
459 genotypes and treatments under study. Despite these limitations, our work shows that  
460 EnsembleFBA shows strong potential for predicting nitrogen substrate utilisation across diverse  
461 bacterial strains, using minimal experimental data and requiring no manual curation of the model.

462  
463 Manipulating the rhizosphere microbiome is one proposed solution to reduce the application of  
464 synthetic chemicals in agriculture, particularly mineral nitrogen fertilisers (3). Plant microbiome  
465 research is being advanced by the collection of thousands of genomically sequenced bacterial  
466 strains isolated from the plant host (20, 21). A current research priority is to characterise the  
467 functional traits encoded by plant-associated microbial strains, in order to rationally design  
468 synthetic microbial communities that can promote plant growth and health (50). Here we analyse  
469 nitrogen metabolism in three bacterial strains previously isolated from field-grown *Arabidopsis*  
470 roots using a combination of experimental and computational approaches. From the growth  
471 analyses, it is evident that all three strains can utilise a large and similar set of nitrogen substrates.  
472 However, proteomic measurements showed that the strains deploy different metabolic strategies  
473 to utilise specific nitrogen sources. One diverging trait appears to be their degree of proteomic  
474 flexibility, with *Pseudomonas* sp. *Root9* utilising lysine via widespread protein-level alterations

475 to its flexible metabolic network. In contrast, *Rhizobium* sp. *Root491* shows relatively stable  
476 proteome composition across diverse nitrogen sources, characterised by minimal alterations to  
477 central metabolism but differential abundance of many transport proteins. In addition, we  
478 document a large set of functionally uncharacterised proteins that display differential abundance  
479 values in response to nitrogen source, with functional annotations being particularly unclear in  
480 Gram-positive *Streptomyces* sp. *Root66D1*. These proteins are potentially important for nitrogen  
481 metabolism in the rhizosphere, and could be the targets of future functional study. Our results  
482 could inform the selection of high-performing strains in synthetic microbial communities  
483 designed to mediate plant nitrogen nutrition under lower inputs of mineral fertilisers.  
484

485 **Materials and methods**

486 ***Bacterial strains***

487 Bacterial strains used in this study were *Pseudomonas* sp. *Root9* (NCBI Taxonomy ID: 1736604),  
488 *Streptomyces* sp. *Root66D1* (NCBI Taxonomy ID: 1736582) and *Rhizobium* sp. *Root491* (NCBI  
489 Taxonomy ID: 1736548), all isolated from field-grown Arabidopsis roots (20), and provided by  
490 Paul Schulze-Lefert, MPIPZ Cologne.

491

492 ***Bacterial pre-cultivation and harvest***

493 Bacterial strains were pre-cultivated by streaking glycerol stocks onto TSA plates (0.5× TSB,  
494 1.2% Agar), and incubating at 28° C for 24 hours. Single colonies were picked from plates and  
495 inoculated into TSB medium (0.5× TSB), and incubated for 24 h at 28° C with 200 rpm shaking.  
496 Next, cells were harvested by centrifuging 800 µL of culture at 5,000× g for 2 min at RT. These  
497 cells were then rinsed 3× in sterile 10 mM MgCl<sub>2</sub>, and resuspended at a final OD<sub>600</sub> of 1.0 in  
498 sterile 10 mM MgCl<sub>2</sub>.

499

500 ***Phenotype microarrays***

501 For phenotype microarrays using PM3B (Biolog), 12 ml of inoculant was prepared comprising 10  
502 mL of 1.2× IF-0 (Biolog), 1.2 mL of 500 mM glucose, 600 uL of bacterial suspension (as  
503 prepared above), 120 uL of Redox Dye D (Biolog) and 80 uL of sterile water. Next, 100 uL of  
504 this inoculant (starting OD<sub>600</sub> of 0.05) was loaded into each well of the phenotype microarray,  
505 which was transferred to a plate reader (Tecan Infinite Pro 100) and incubated at 28° C for 72 h  
506 with shaking (30 sec continuous orbital shaking followed by 9:30 min stationary, shaking  
507 amplitude 3 mm). Tetrazolium reduction at A<sub>590</sub> was measured once per 10 min cycle, without  
508 correcting for path length, and derived curves were fitted to a logistic equation using the

509 Growthcurver program (51). For each well in every assay, background was subtracted by  
510 subtracting the value of the negative control (well A1) from each time point. In our hands,  
511 guanosine (well F7) gave a very high background reading and was excluded from the analysis.  
512 Wells were considered growth-positive if the carrying capacity ( $k$ ) of the logistic fit was greater  
513 than  $A_{590}$  of 0.1 in at least two of the three independent biological replicates. Next, area under the  
514 curve (AUC) values for all growth-positive wells were z-score normalised within each strain, and  
515 the average value of the three replicate assays was calculated. These averaged z-score values  
516 were divided into quartiles, so data presented in Fig 1 represent five possible growth intensities,  
517 ranging from 0 (no growth) to 4 (highest AUC quartile).

518

### 519 *Metabolic models and computational simulations*

520 The EnsembleFBA workflow from Biggs and Papin (26) was adapted to analyse the three studied  
521 bacterial strains. Scripts were implemented either in Matlab (Mathworks) as the original code, or  
522 adapted for Python (Python Software Foundation). Briefly, genomes were downloaded from  
523 NCBI (52) and uploaded to KBase (25), where genome re-annotation and draft metabolic model  
524 reconstruction was performed. Outputted draft networks were downloaded and used as inputs for  
525 the EnsembleFBA workflow. Also inputted to Ensemble FBA were the composition of the  
526 Biolog media, and the experimentally derived growth matrices obtained from PM3B phenotype  
527 microarray. Next, 50 metabolic networks were generated for each strain, with each network being  
528 trained on 26 nitrogen substrates that supported growth and 11 nitrogen substrates that didn't  
529 support growth, in order to perform positive and negative gapfilling. Compounds present on the  
530 phenotype microarray but not found in the ModelSEED database (24) were excluded, and a  
531 second set of simulations excluding the five N-sources used for proteomics experiments were  
532 also obtained for unbiased integration with the proteomics datasets. To evaluate the performance



533 of EnsembleFBA for predicting growth on the different N-sources, its accuracy, precision and  
534 recall were compared to randomly generated predictions, after masking the conditions used to  
535 gapfill the individual networks to avoid bias. Metabolic activity on a given nitrogen source was  
536 estimated as the average growth rate obtained with EnsembleFBA, and weighted according to the  
537 fraction of networks in the ensemble that predicted growth. Metabolic fluxes through specific  
538 reactions were estimated by averaging the reaction flux for each reaction across all the networks  
539 in the ensemble, and weighted according to the fraction of networks where the reaction was  
540 active. To visualise up- or down-regulated metabolic fluxes in metabolic pathway maps,  
541 metabolic fluxes obtained by simulating growth on Glutamate, Serine or Lysine were compared  
542 versus Ammonium, and filtered for reactions with log<sub>2</sub> fold change greater than 1.

543

#### 544 *Cultivation on individual N-sources for growth assays and proteomic analysis*

545 For growth assays on individual N-sources, media were based on M9 formulation (53), with  
546 nutrient concentrations of: 50 mM glucose, 24 mM Na<sub>2</sub>HPO<sub>4</sub>, 11 mM KH<sub>2</sub>PO<sub>4</sub>, 4 mM NaCl, 350  
547 μM MgSO<sub>4</sub>, 100 μM CaCl<sub>2</sub>, 50 μM Fe-EDTA, 50 μM H<sub>3</sub>BO<sub>3</sub>, 10 μM MnCl<sub>2</sub>, 1.75 μM ZnCl<sub>2</sub>, 1  
548 μM KI, 800 nM Na<sub>2</sub>MoO<sub>4</sub>, 500 nM CuCl<sub>2</sub>, 100 nM CoCl<sub>2</sub>. To this, one nitrogen source was  
549 added at 5 mM elemental-N (ie: 5 mM of ammonium, glutamate and serine, or 2.5 mM of urea  
550 and lysine). For growth assays, 20 μL of bacterial suspension (as prepared above) was inoculated  
551 into 380 μL of growth medium (starting OD<sub>600</sub> of 0.05), in individual wells of a sterile 48-well  
552 plate (Corning). These plates were then transferred to a plate reader (Tecan Infinite Pro 100) and  
553 incubated at 28° C for 48 h with shaking (3 min continuous orbital shaking followed by 7 min  
554 stationary, shaking amplitude 3 mm). Culture density at OD<sub>600</sub> was measured once per 10 min  
555 cycle, without correcting for path length. To obtain quantitative growth metrics, a logistic  
556 equation was fitted to measured growth curves using the Growthcurver program (51). To collect

557 samples for proteomics, cultivation was identical, except that bacterial cells were harvested  
558 during the exponential growth phase. Harvest involved pooling of four duplicate wells (total of  
559 1.6 mL culture), followed by centrifugation at 10,000× g for 3 min at 4° C. Supernatant was  
560 discarded, and cell pellets were rinsed twice with 900 uL of 4° C PBS via centrifugation at  
561 10,000x g for 3 min at 4° C. Rinsed cell pellets were then flash-frozen and stored at -80° C.

562

### 563 *Proteomic sample preparation*

564 Cellular protein was extracted using protocols modified from Tanca et al (54) as well as Wessel  
565 and Flugge (55). To frozen cell pellets, 250 uL of lysis buffer (5% SDS, 100 mM DTT, 100 mM  
566 Tris pH 7.5) was added, along with ~100 uL of acid-washed glass beads (1 mm diameter).  
567 Samples were then incubated for 10 min on an orbital mixer at 95° C with 1500 rpm shaking,  
568 then at -80° C for 10 min, then bead-beaten (Bead Ruptor 24, Omni International) at 5 ms<sup>-1</sup> for  
569 10 min. Next, samples were again incubated at -80° C for 10 min, then again incubated for 10  
570 min on an orbital mixer at 95° C with 1500 rpm shaking, then again bead-beaten at 5 ms<sup>-1</sup> for 10  
571 min. Finally, samples were centrifuged at 20,000x g for 10 min at RT, and 200 uL of supernatant  
572 was transferred to a new tube. Protein was then precipitated via the addition of 800 uL MeOH,  
573 500 uL H<sub>2</sub>O, and 200 uL chloroform followed by centrifugation at 10,000x g for 5 min at 4° C.  
574 The upper aqueous phase was removed and discarded, then 700 uL MeOH was added to the  
575 lower organic phase and samples were centrifuged at 20,000x g for 10 min at 4° C. Protein  
576 pellets were then rinsed twice with -20° C acetone via centrifugation at 20,000x g for 10 min at  
577 4d C, before being air-dried at RT for 15 min. Dried protein pellets were then stored at -80° C. To  
578 solubilise protein pellets, 40 uL of solubilisation buffer (8 M urea, 50 mM TEAB, 5 mM DTT)  
579 was added, and samples were incubated on an orbital mixer at 28° C for 1 h with 350 rpm  
580 mixing. Next, CAA was added to a final concentration of 30 mM, and samples were incubated on

581 an orbital mixer at 28° C for 30 min with 350 rpm mixing in darkness. To quantify protein  
582 concentration, an aliquot of the protein extract was taken and diluted 1:8 in water, then a  
583 Bradford assay was performed on the diluted protein samples using BSA as standard. Next, 40 ug  
584 of protein extract was transferred to a new tube and incubated with 0.8 ug Lys-C for 2 h at 37° C  
585 with 350 rpm shaking. Samples were then diluted 1:8 in TEAB, 0.8 ug of trypsin was added, and  
586 samples were incubated overnight at 37° C. Next day, samples were acidified by adding formic  
587 acid to a final concentration of 1%. Peptides were then cleaned up via SPE using SDB-RP stage  
588 tips. Following elution from stage tips, peptides were dried down in a vacuum centrifuge and  
589 stored at -80° C.

590

#### 591 *Mass spectrometry*

592 Digested peptides were analysed on a QExactive Plus mass spectrometer (Thermo Scientific)  
593 coupled to an EASY nLC 1000 UPLC (Thermo Scientific). Dried peptides were resolubilised in  
594 solvent A (0.1% formic acid), and loaded onto an in-house packed C18 column (50 cm × 75 µm  
595 I.D., filled with 2.7 µm Poroshell 120, (Agilent)). Following loading, samples were eluted from  
596 the C18 column with solvent B (0.1% formic acid in 80% acetonitrile) using a 2.5 h gradient,  
597 comprising: linear increase from 4-27% B over 120 min, 27-50% B over 19 min, followed by  
598 column washing and equilibration. Flow rate was at 250 nL/min. Data-dependent acquisition was  
599 used to acquire MS/MS data, whereby the 10 most abundant ions (charges 2-5) in the survey  
600 spectrum were subjected to HCD fragmentation. MS scans were acquired from 300 to 1750 m/z  
601 at a resolution of 70,000, while MS/MS scans were acquired at a resolution of 17,500. Following  
602 fragmentation, precursor ions were dynamically excluded for 25 s.

603

#### 604 *Label-free protein quantification*

605 Label-free quantification of protein abundance was conducted with MaxQuant v1.5.3.8 (56).  
606 Acquired MS/MS spectra were searched against FASTA protein sequences for the three studied  
607 bacterial strains, obtained from IMG (57). Sequences of common contaminant proteins were also  
608 included in the search database. Protein FDR and PSM FDR were set to 0.01%. Minimum  
609 peptide length was seven amino acids, cysteine carbamidomethylation was set as a fixed  
610 modification, while methionine oxidation and protein N-terminal acetylation were set as variable  
611 modifications.

612

### 613 *Statistical analysis of proteomic data*

614 To determine proteins that exhibited significantly different abundance between N-treatments, a  
615 statistical threshold was imposed where the MaxQuant LFQ values must differ by  $\log_2FC > 1$  and  
616 BH-p-value  $< 0.05$ . To determine the abundance of Kegg Orthologues (KOs) across bacterial  
617 strains and N-treatments, KOs annotated to proteins via IMG were matched across bacterial  
618 strains. Data were filtered to contain only the 495 KOs that were observed in at least three  
619 replicates across all five treatments in all three strains. In instances where a single strain had  
620 multiple proteins matching the same KO, the protein with the highest average MaxQuant LFQ  
621 value across all samples was taken as the representative KO for that strain. To determine the  
622 KEGG pathways that were significantly modulated at the protein abundance level between  
623 nitrogen treatments, KOs annotated onto proteins via IMG were mapped against KEGG pathways  
624 using KEGG-REST, and Fisher's exact test was used to generate a single p-value for each KEGG  
625 pathway by combining the individual BH-p-values for all constituent proteins mapped to that  
626 pathway. Pathways were only analysed when at least three representative proteins were detected  
627 for a single strain across all five nitrogen treatments, and pathways associated with non-bacterial  
628 processes were discarded.

629

### 630 **Data availability**

631 All LC-MS/MS files and MaxQuant outputs have been uploaded to ProteomXchange and can be  
632 accessed via PRIDE (URL: <https://www.ebi.ac.uk/pride/archive/>, Accession: PXD011436,  
633 Username: reviewer58195@ebi.ac.uk, Password: IG63IYVi). Details of the EnsembleFBA  
634 workflow are available at: <https://github.com/asuccurro/ensembleFBA>, and the KBase narrative  
635 is available at <https://narrative.kbase.us/narrative/ws.37070.obj.1>. Interactive maps of metabolic  
636 pathways modulated between amino acid treatments can be viewed at:  
637 <https://pathways.embl.de/shared/rjacoby>.

638

### 639 **Acknowledgements**

640 We thank Paul Schulze-Lefert (Max Planck Institute for Plant Breeding, Cologne) for providing  
641 bacterial strains, as well as Christian Frese and Corinna Klein (Proteomics Core Facility Cologne,  
642 University of Cologne) for conducting proteomics measurements. RPJ is funded by a Humboldt  
643 Research Fellowship, and previously by the Horizon 2020 Marie Curie Sklodowska Action  
644 project 705808 – PINBAC. Research in SK's lab is funded by the Deutsche  
645 Forschungsgemeinschaft (DFG) under Germany's Excellence Strategy – EXC 2048/1 – project  
646 390686111.

647

648 **Literature cited**

- 649 1. Zhang X, Davidson EA, Mauzerall DL, Searchinger TD, Dumas P, Shen Y. 2015.  
650 Managing nitrogen for sustainable development. *Nature* 528:51-59.
- 651 2. Hirsch PR, Mauchline TH. 2015. The Importance of the Microbial N Cycle in Soil for  
652 Crop Plant Nutrition, p 45-71. *In* Sariaslani S, Gadd GM (ed), *Advances in Applied*  
653 *Microbiology*, Vol 93, vol 93. Elsevier Academic Press Inc, San Diego.
- 654 3. Bender SF, Wagg C, van der Heijden MGA. 2016. An Underground Revolution:  
655 Biodiversity and Soil Ecological Engineering for Agricultural Sustainability. *Trends in*  
656 *Ecology & Evolution* 31:440-452.
- 657 4. Trivedi P, Schenk PM, Wallenstein MD, Singh BK. 2017. Tiny Microbes, Big Yields:  
658 enhancing food crop production with biological solutions. *Microbial Biotechnology*  
659 10:999-1003.
- 660 5. Bloom AJ. 2015. The increasing importance of distinguishing among plant nitrogen  
661 sources. *Current Opinion in Plant Biology* 25:10-16.
- 662 6. Peoples MB, Brockwell J, Herridge DF, Rochester IJ, Alves BJR, Urquiaga S, Boddey  
663 RM, Dakora FD, Bhattarai S, Maskey SL, Sampet C, Rerkasem B, Khan DF, Hauggaard-  
664 Nielsen H, Jensen ES. 2009. The contributions of nitrogen-fixing crop legumes to the  
665 productivity of agricultural systems. *Symbiosis* 48:1-17.
- 666 7. Kuzyakov Y, Xu XL. 2013. Competition between roots and microorganisms for nitrogen:  
667 mechanisms and ecological relevance. *New Phytologist* 198:656-669.
- 668 8. Harrison KA, Bol R, Bardgett RD. 2007. Preferences for different nitrogen forms by  
669 coexisting plant species and soil microbes. *Ecology* 88:989-999.
- 670 9. Jones DL, Clode PL, Kilburn MR, Stockdale EA, Murphy DV. 2013. Competition  
671 between plant and bacterial cells at the microscale regulates the dynamics of nitrogen  
672 acquisition in wheat (*Triticum aestivum*). *New Phytologist* 200:796-807.
- 673 10. Phillips DA, Fox TC, King MD, Bhuvaneshwari TV, Teuber LR. 2004. Microbial products  
674 trigger amino acid exudation from plant roots. *Plant Physiology* 136:2887-2894.
- 675 11. Warren CR. 2015. Wheat roots efflux a diverse array of organic N compounds and are  
676 highly proficient at their recapture. *Plant and Soil* 397:147-162.
- 677 12. Koser SA, Rettger LF. 1919. Studies on Bacterial Nutrition: The Utilization of  
678 Nitrogenous Compounds of Definite Chemical Composition. *The Journal of Infectious*  
679 *Diseases* 24:301-321.
- 680 13. Merrick MJ, Edwards RA. 1995. Nitrogen control in bacteria. *Microbiological Reviews*  
681 59:604-&.
- 682 14. van Heeswijk WC, Westerhoff HV, Boogerd FC. 2013. Nitrogen Assimilation in  
683 *Escherichia coli*: Putting Molecular Data into a Systems Perspective. *Microbiology and*  
684 *Molecular Biology Reviews* 77:628-695.
- 685 15. Fisher SH. 1999. Regulation of nitrogen metabolism in *Bacillus subtilis*: vive la  
686 difference! *Molecular Microbiology* 32:223-232.
- 687 16. Amon J, Titgemeyer F, Burkovski A. 2010. Common patterns - unique features: nitrogen  
688 metabolism and regulation in Gram-positive bacteria. *Fems Microbiology Reviews*  
689 34:588-605.
- 690 17. Geisseler D, Horwath WR, Joergensen RG, Ludwig B. 2010. Pathways of nitrogen  
691 utilization by soil microorganisms - A review. *Soil Biology & Biochemistry* 42:2058-  
692 2067.
- 693 18. Moe LA. 2013. Amino acids in the rhizosphere: from plants to microbes. *American*  
694 *Journal of Botany* 100:1692-1705.

- 695 19. Muller DB, Vogel C, Bai Y, Vorholt JA. 2016. The Plant Microbiota: Systems-Level  
696 Insights and Perspectives, p 211-234. *In* Bonini NM (ed), Annual Review of Genetics,  
697 Vol 50, vol 50. Annual Reviews, Palo Alto.
- 698 20. Bai Y, Muller DB, Srinivas G, Garrido-Oter R, Potthoff E, Rott M, Dombrowski N,  
699 Munch PC, Spaepen S, Remus-Emsermann M, Huttel B, McHardy AC, Vorholt JA,  
700 Schulze-Lefert P. 2015. Functional overlap of the Arabidopsis leaf and root microbiota.  
701 *Nature* 528:364-+.
- 702 21. Levy A, Gonzalez IS, Mittelviehhaus M, Clingenpeel S, Paredes SH, Miao JM, Wang KR,  
703 Devescovi G, Stillman K, Monteiro F, Alvarez BR, Lundberg ADS, Lu TY, Lebeis S, Jin  
704 Z, McDonald M, Klein AP, Feltcher ME, Rio TG, Grant SR, Doty SL, Ley RE, Zhao BY,  
705 Venturi V, Pelletier DA, Vorholt JA, Tringe SG, Woyke T, Dangl JL. 2018. Genomic  
706 features of bacterial adaptation to plants. *Nature Genetics* 50:138-+.
- 707 22. Levy A, Conway JM, Dangl JL, Woyke T. 2018. Elucidating Bacterial Gene Functions in  
708 the Plant Microbiome. *Cell Host & Microbe* 24:475-485.
- 709 23. Zomorodi AR, Segre D. 2016. Synthetic Ecology of Microbes: Mathematical Models and  
710 Applications. *Journal of Molecular Biology* 428:837-861.
- 711 24. Henry CS, DeJongh M, Best AA, Frybarger PM, Linsay B, Stevens RL. 2010. High-  
712 throughput generation, optimization and analysis of genome-scale metabolic models.  
713 *Nature Biotechnology* 28:977-U22.
- 714 25. Arkin AP, Cottingham RW, Henry CS, Harris NL, Stevens RL, Maslov S, Dehal P, Ware  
715 D, Perez F, Canon S, Sneddon MW, Henderson ML, Riehl WJ, Murphy-Olson D, Chan  
716 SY, Kamimura RT, Kumari S, Drake MM, Brettin TS, Glass EM, Chivian D, Gunter D,  
717 Weston DJ, Allen BH, Baumohl J, Best AA, Bowen B, Brenner SE, Bun CC, Chandonia  
718 JM, Chia JM, Colasanti R, Conrad N, Davis JJ, Davison BH, DeJongh M, Devoid S,  
719 Dietrich E, Dubchak I, Edirisinghe JN, Fang G, Faria JP, Frybarger PM, Gerlach W,  
720 Gerstein M, Greiner A, Gurtowski J, Haun HL, He F, Jain R, et al. 2018. KBase: The  
721 United States Department of Energy Systems Biology Knowledgebase. *Nature*  
722 *Biotechnology* 36:566-569.
- 723 26. Biggs MB, Papin JA. 2017. Managing uncertainty in metabolic network structure and  
724 improving predictions using EnsembleFBA. *Plos Computational Biology* 13.
- 725 27. Bulgarelli D, Rott M, Schlaeppli K, van Themaat EVL, Ahmadinejad N, Assenza F, Rauf  
726 P, Huettel B, Reinhardt R, Schmelzer E, Peplies J, Gloeckner FO, Amann R, Eickhorst T,  
727 Schulze-Lefert P. 2012. Revealing structure and assembly cues for Arabidopsis root-  
728 inhabiting bacterial microbiota. *Nature* 488:91-95.
- 729 28. Schlaeppli K, Dombrowski N, Oter RG, van Themaat EVL, Schulze-Lefert P. 2014.  
730 Quantitative divergence of the bacterial root microbiota in Arabidopsis thaliana relatives.  
731 *Proceedings of the National Academy of Sciences of the United States of America*  
732 111:585-592.
- 733 29. Lopez-Guerrero MG, Ormeno-Orrillo E, Rosenblueth M, Martinez-Romero J, Martinez-  
734 Romero E. 2013. Buffet hypothesis for microbial nutrition at the rhizosphere. *Frontiers in*  
735 *Plant Science* 4.
- 736 30. Egli T. 2015. Microbial growth and physiology: a call for better craftsmanship. *Frontiers*  
737 *in Microbiology* 6.
- 738 31. Rolfe MD, Rice CJ, Lucchini S, Pin C, Thompson A, Cameron ADS, Alston M, Stringer  
739 MF, Betts RP, Baranyi J, Peck MW, Hinton JCD. 2012. Lag Phase Is a Distinct Growth  
740 Phase That Prepares Bacteria for Exponential Growth and Involves Transient Metal  
741 Accumulation. *Journal of Bacteriology* 194:686-701.

- 742 32. Kanehisa M, Sato Y, Kawashima M, Furumichi M, Tanabe M. 2016. KEGG as a  
743 reference resource for gene and protein annotation. *Nucleic Acids Research* 44:D457-  
744 D462.
- 745 33. Darzi Y, Letunic I, Bork P, Yamada T. 2018. iPath3.0: interactive pathways explorer v3.  
746 *Nucleic Acids Research* 46:W510-W513.
- 747 34. Sohlenkamp C, Geiger O. 2016. Bacterial membrane lipids: diversity in structures and  
748 pathways. *Fems Microbiology Reviews* 40:133-159.
- 749 35. Kim HS, Park SJ, Lee KH. 2009. Role of NtrC-regulated exopolysaccharides in the  
750 biofilm formation and pathogenic interaction of *Vibrio vulnificus*. *Molecular*  
751 *Microbiology* 74:436-453.
- 752 36. Wang D, Xue HY, Wang YW, Yin RC, Xie F, Luo L. 2013. The *Sinorhizobium meliloti*  
753 *ntrX* Gene Is Involved in Succinoglycan Production, Motility, and Symbiotic Nodulation  
754 on Alfalfa. *Applied and Environmental Microbiology* 79:7150-7159.
- 755 37. Hervas AB, Canosa I, Santero E. 2010. Regulation of glutamate dehydrogenase  
756 expression in *Pseudomonas putida* results from its direct repression by NtrC under  
757 nitrogen-limiting conditions. *Molecular Microbiology* 78:305-319.
- 758 38. Lochhead AG, Thexton RH. 1947. Qualitative studies of soil micro-organisms. 7. The  
759 rhizosphere effect in relation to the amino acid nutrition of bacteria. *Canadian Journal of*  
760 *Research Section C-Botanical Sciences* 25:20-26.
- 761 39. van der Heijden MGA, Bardgett RD, van Straalen NM. 2008. The unseen majority: soil  
762 microbes as drivers of plant diversity and productivity in terrestrial ecosystems. *Ecology*  
763 *Letters* 11:296-310.
- 764 40. Zhalnina K, Louie KB, Hao Z, Mansoori N, da Rocha UN, Shi S, Cho H, Karaoz U,  
765 Loque D, Bowen BP, Firestone MK, Northen TR, Brodie EL. 2018. Dynamic root  
766 exudate chemistry and microbial substrate preferences drive patterns in rhizosphere  
767 microbial community assembly. *Nat Microbiol* 3:470-480.
- 768 41. Wang JL, Yan DL, Dixon R, Wang YP. 2016. Deciphering the Principles of Bacterial  
769 Nitrogen Dietary Preferences: a Strategy for Nutrient Containment. *Mbio* 7.
- 770 42. Wang WH, Liu GW, Cao FQ, Cheng XY, Liu BW, Liu LH. 2013. Inadequate root uptake  
771 may represent a major component limiting rice to use urea as sole nitrogen source for  
772 growth. *Plant and Soil* 363:191-200.
- 773 43. Witte CP. 2011. Urea metabolism in plants. *Plant Science* 180:431-438.
- 774 44. Finkel OM, Castrillo G, Paredes SH, Gonzalez IS, Dangl JL. 2017. Understanding and  
775 exploiting plant beneficial microbes. *Current Opinion in Plant Biology* 38:155-163.
- 776 45. Garrido-Oter R, Nakano RT, Dombrowski N, Ma KW, McHardy AC, Schulze-Lefert P,  
777 AgBiome T. 2018. Modular Traits of the Rhizobiales Root Microbiota and Their  
778 Evolutionary Relationship with Symbiotic Rhizobia. *Cell Host & Microbe* 24:155-+.
- 779 46. Jacoby RP, Martyn A, Kopriva S. 2018. Exometabolomic profiling of bacterial strains  
780 cultivated using *Arabidopsis* root extract as the sole carbon source. *Mol Plant Microbe*  
781 *Interact* doi:10.1094/mpmi-10-17-0253-r.
- 782 47. Succurro A, Moejes FW, Ebenhoh O. 2017. A Diverse Community To Study  
783 Communities: Integration of Experiments and Mathematical Models To Study Microbial  
784 Consortia. *Journal of Bacteriology* 199.
- 785 48. Gerosa L, Sauer U. 2011. Regulation and control of metabolic fluxes in microbes. *Current*  
786 *Opinion in Biotechnology* 22:566-575.
- 787 49. Xavier JC, Patil KR, Rocha I. 2017. Integration of Biomass Formulations of Genome-  
788 Scale Metabolic Models with Experimental Data Reveals Universally Essential Cofactors  
789 in Prokaryotes. *Metabolic Engineering* 39:200-208.



- 790 50. Busby PE, Soman C, Wagner MR, Friesen ML, Kremer J, Bennett A, Morsy M, Eisen JA,  
791 Leach JE, Dangl JL. 2017. Research priorities for harnessing plant microbiomes in  
792 sustainable agriculture. *Plos Biology* 15.
- 793 51. Sprouffske K, Wagner A. 2016. Growthcurver: an R package for obtaining interpretable  
794 metrics from microbial growth curves. *Bmc Bioinformatics* 17.
- 795 52. Agarwala R, Barrett T, Beck J, Benson DA, Bollin C, Bolton E, Bourexis D, Brister JR,  
796 Bryant SH, Canese K, Cavanaugh M, Charowhas C, Clark K, Dondoshansky I, Feolo M,  
797 Fitzpatrick L, Funk K, Geer LY, Gorelenkov V, Graeff A, Hlavina W, Holmes B, Johnson  
798 M, Kattman B, Khotomlianski V, Kimchi A, Kimelman M, Kimura M, Kitts P, Klimke  
799 W, Kotliarov A, Krasnov S, Kuznetsov A, Landrum MJ, Landsman D, Lathrop S, Lee  
800 JM, Leubsdorf C, Lu ZY, Madden TL, Marchler-Bauer A, Malheiro A, Meric P, Karsch-  
801 Mizrachi I, Mnev A, Murphy T, Orris R, Ostell J, O'Sullivan C, Palanigobu V, et al. 2018.  
802 Database resources of the National Center for Biotechnology Information. *Nucleic Acids*  
803 *Research* 46:D8-D13.
- 804 53. CSHL. 2010. M9 minimal medium (standard). Cold Spring Harbor Protocols  
805 2010:pdb.rec12295.
- 806 54. Tanca A, Palomba A, Pisanu S, Deligios M, Fraumene C, Manghina V, Pagnozzi D,  
807 Addis MF, Uzzau S. 2014. A straightforward and efficient analytical pipeline for  
808 metaproteome characterization. *Microbiome* 2.
- 809 55. Wessel D, Flugge UI. 1984. A method for the quantitative recovery of protein in dilute-  
810 solution in the presence of detergents and lipids. *Analytical Biochemistry* 138:141-143.
- 811 56. Tyanova S, Temu T, Cox J. 2016. The MaxQuant computational platform for mass  
812 spectrometry-based shotgun proteomics. *Nature Protocols* 11:2301-2319.
- 813 57. Chen IMA, Markowitz VM, Chu K, Palaniappan K, Szeto E, Pillay M, Ratner A, Huang  
814 JH, Andersen E, Huntemann M, Varghese N, Hadjithomas M, Tennessen K, Nielsen T,  
815 Ivanova NN, Kyrpides NC. 2017. IMG/M: integrated genome and metagenome  
816 comparative data analysis system. *Nucleic Acids Research* 45:D507-D516.

817

818

819

820 **Figure captions**

821 Figure 1: Nitrogen substrate preferences of three rhizosphere bacterial strains assessed via  
822 Phenotype Microarray and EnsembleFBA. Displayed here are results for 30 nitrogen substrates  
823 selected from the 94 tested. White boxes indicate no metabolic activity, whereas boxes with  
824 darker shades correspond to higher metabolic activity, either measured via Phenotype Microarray  
825 (pink) or predicted via EnsembleFBA (green). Metabolic activity values were z-score normalised  
826 within each strain.

827  
828 Figure 2: Growth curves of three rhizosphere strains cultivated on five nitrogen sources. Cultures  
829 were grown in 48-well plates on minimal medium containing a single nitrogen source.  $OD_{600}$   
830 (uncorrected for path length) was logged every 10 min using a plate reader.

831  
832 Figure 3: Overview of proteome composition in three rhizosphere bacterial strains when  
833 cultivated on five nitrogen sources. A: Principal component analysis (PCA) of the five different  
834 nitrogen sources for each strain. B: Heat maps of protein abundance for differentially expressed  
835 proteins (DEPs) for each of the three strains. To define DEPs, protein abundance in one condition  
836 was compared to its abundance in the other four conditions. If in any of these 10 comparisons, a  
837 protein has a  $\log_2FC > 1$  and a BH-p-value  $< 0.05$ , then it is considered a DEP. Only DEPs that  
838 were detected in at least three replicates for all five nitrogen treatments are included in the  
839 heatmaps. Rows were clustered using Pearson's correlation coefficient.

840  
841 Figure 4: Comparison of protein abundance values for 495 KOs (Kegg orthologs) across three  
842 rhizosphere bacterial strains cultivated on five nitrogen sources. A: Heat map of KO abundance  
843 across the three rhizosphere bacterial strains cultivated under five nitrogen sources. B: Principal

844 component analysis (PCA) of KO abundance across the three rhizosphere bacterial strains  
845 cultivated under five nitrogen sources. C: Principal component analysis (PCA) of KO abundance  
846 across the three rhizosphere bacterial strains for the four organic nitrogen sources, when KO  
847 abundance was normalised to ammonium (inorganic reference). The KOs annotated to proteins  
848 via IMG were matched across the proteomic dataset for the three bacterial strains. Data was  
849 filtered to contain only the 495 KOs that were observed in all four replicates across all five  
850 treatments in all three strains. MaxQuant LFQ abundance values were z-score normalised within  
851 each strain. Rows and columns were clustered using Pearson's correlation coefficient.

852  
853 Figure 5: Assessment of KEGG pathways that were modulated at the protein abundance level  
854 between different nitrogen treatments. Kegg orthologs annotated to proteins via IMG were  
855 matched to KEGG pathways, and Fisher's exact test was used to determine the statistical  
856 significance of pathway modulation between two nitrogen treatments. Darker shades of pink  
857 represent lower p-values via Fisher's exact test. Pathways with fewer than three identified  
858 proteins were excluded from analysis. This figures shows the 30 pathways with the highest  
859 number of significantly differences between treatments ( $p < 0.01$ ), data for all ~100 pathways are  
860 in Supplementary Table S6.

861  
862 Figure 6: Investigating proteins correlated to the abundance of nitrogen stress response  
863 component PII. A: Abundance of the PII protein across five nitrogen treatments in three  
864 rhizosphere bacterial strains. Different letters above data series indicate  $p < 0.05$  following two-  
865 way ANOVA and Tukey's HSD test. B: Plots to highlight proteins that are positively or  
866 negatively correlated to PII according to their abundance values across five nitrogen treatments.  
867 Y-displays the slope of the linear fit (z-score normalised) between protein abundance versus the

868 abundance of PII protein, and X-axis displays correlation between protein abundance versus PII  
869 abundance. If a protein has a correlation higher than 0.75 and a slope higher than 2, it is deemed  
870 positively correlated, whereas if a protein has a correlation lower than 0.75 and a slope lower  
871 than -2, it is deemed negatively correlated to PII.

872

873 **Table caption:**

874 Table 1: Summary of label free quantitative proteomic data for three rhizosphere bacterial strains  
875 cultivated on five different nitrogen sources.

876

877 **Supplementary Figure captions:**

878 Supplementary Figure S1: Nitrogen substrate preferences of three rhizosphere bacterial strains  
879 assessed via Phenotype Microarray and EnsembleFBA. Displayed here are metabolic activity  
880 values for 94 nitrogen substrates measured via phenotype microarray and 81 nitrogen substrates  
881 predicted via EnsembleFBA. White boxes indicate no metabolic activity, while boxes with darker  
882 shades correspond to higher metabolic activity, either measured via Phenotype Microarray (pink)  
883 or predicted via EnsembleFBA (green). Metabolic activity values were z-score normalised within  
884 each strain.

885

886 Supplementary Figure S2: Comparison of measured versus predicted nitrogen substrate  
887 utilisation for three rhizosphere bacterial strains. A: Venn diagram showing nitrogen substrate  
888 utilisation for three bacterial strains as measured using phenotype microarray. B, C and E: Plots  
889 showing the correlation between predicted metabolic activity (EnsembleFBA) versus measured  
890 metabolic activity (EnsembleFBA) for 81 nitrogen substrates across three bacterial strains. D:

891 Venn diagram nitrogen substrate utilisation for three rhizosphere bacterial strains as predicted  
892 using EnsembleFBA.

893  
894 Supplementary Figure S3: Determination of ammonium concentration where nitrogen is the yield  
895 limiting nutrient in batch culture. Three rhizosphere bacterial strains were cultivated on media  
896 containing different concentrations of  $\text{NH}_4\text{Cl}$ , and  $\text{OD}_{600}$  was logged every 10 min in a plate  
897 reader. Logistic growth equations were fitted to derived growth curves, and in these graphs the  
898 carrying capacity ( $k$ ) of the logistic fits is plotted against  $\text{NH}_4\text{Cl}$  concentration. There is a linear  
899 relationship between  $k$  and  $\text{NH}_4\text{Cl}$  concentration until around 10 mM, indicating that N is the  
900 yield-limiting nutrient at these concentrations. Therefore, nitrogen was supplied at 5 mM N for  
901 all experiments.

902  
903 Supplementary Figure S4: Volcano plots of proteomic data for *Pseudomonas* sp. *Root9* grown on  
904 five different nitrogen sources. For proteins that were detected in three or more replicates in both  
905 treatments, the Y-axis shows  $-\log_{10}$  of the Benjamini-Hochberg p-value, while X-axis shows the  
906  $\log_2$  fold change. Proteins with a  $\log_2$  fold change  $\geq 1$  and Benjamini-Hochberg p-value  $\leq 0.05$   
907 are deemed differentially expressed and rendered in colour. In total, 10 comparisons were  
908 performed, A: Ammonium vs Glutamate, B: Ammonium vs Lysine, C: Ammonium vs Serine, D:  
909 Ammonium vs Urea, E: Glutamate vs Lysine, F: Glutamate vs Serine, G: Glutamate vs Urea, H:  
910 Lysine vs Serine, I: Lysine vs Urea, J: Serine vs Urea:

911  
912 Supplementary Figure S5: Volcano plots of proteomic data for *Streptomyces* sp. *Root66D1* grown  
913 on five different nitrogen sources. For proteins that were detected in three or more replicates in  
914 both treatments, the Y-axis shows  $-\log_{10}$  of the Benjamini-Hochberg p-value, while X-axis

915 shows the log<sub>2</sub> fold change. Proteins with a log<sub>2</sub> fold change  $\geq 1$  and Benjamini-Hochberg p-  
916 value  $\leq 0.05$  are deemed differentially expressed and rendered in colour. In total, 10 comparisons  
917 were performed, A: Ammonium vs Glutamate, B: Ammonium vs Lysine, C: Ammonium vs  
918 Serine, D: Ammonium vs Urea, E: Glutamate vs Lysine, F: Glutamate vs Serine, G: Glutamate vs  
919 Urea, H: Lysine vs Serine, I: Lysine vs Urea, J: Serine vs Urea:

920  
921 Supplementary Figure S6: Volcano plots of proteomic data for *Rhizobium* sp. *Root491* grown on  
922 five different nitrogen sources. For proteins that were detected in three or more replicates in both  
923 treatments, the Y-axis shows  $-\log_{10}$  of the Benjamini-Hochberg p-value, while X-axis shows the  
924 log<sub>2</sub> fold change. Proteins with a log<sub>2</sub> fold change  $\geq 1$  and Benjamini-Hochberg p-value  $\leq 0.05$   
925 are deemed differentially expressed and rendered in colour. In total, 10 comparisons were  
926 performed, A: Ammonium vs Glutamate, B: Ammonium vs Lysine, C: Ammonium vs Serine, D:  
927 Ammonium vs Urea, E: Glutamate vs Lysine, F: Glutamate vs Serine, G: Glutamate vs Urea, H:  
928 Lysine vs Serine, I: Lysine vs Urea, J: Serine vs Urea:

929  
930 Supplementary Figure S7: Differentially expressed proteins mapped onto metabolic pathways for  
931 three rhizosphere bacterial strains cultivated on amino acids as the sole nitrogen source. Protein  
932 abundance data from each of the three amino acid treatments (glutamate, lysine and serine) is  
933 compared against the ammonium control. For proteins that were detected in three or more  
934 replicates in both treatments, Kegg orthologs annotated to proteins via IMG were matched to the  
935 'Metabolic Pathways' map provided via the Interactive Pathways Explorer v3. KOs matching  
936 proteins with a log<sub>2</sub> fold change  $\geq 1$  and Benjamini-Hochberg p-value  $\leq 0.05$  are deemed  
937 differentially expressed and rendered in colour. KOs matching proteins that were not

938 differentially expressed are rendered in grey. Interactive maps can be viewed at:  
939 <https://pathways.embl.de/shared/rjacoby>.

940  
941 Supplementary Figure S8: Differentially expressed fluxes mapped onto metabolic pathways for  
942 three rhizosphere bacterial strains cultivated on amino acids as the sole nitrogen source. Modelled  
943 flux from each of the three amino acid treatments (glutamate, lysine and serine) is compared  
944 against the ammonium control. Kegg reactions annotated via KBase were matched to the  
945 ‘Metabolic Pathways’ map provided via the Interactive Pathways Explorer v3. Reaction fluxes  
946 with a log<sub>2</sub> fold change  $\geq 1$  are rendered in colour. Fluxes that were not different expressed are  
947 rendered in grey. Interactive maps can be viewed at: <https://pathways.embl.de/shared/asuccurro>.

948  
949 **Supplementary Table captions:**  
950 Supplementary Table S1: Nitrogen substrate utilisation of three rhizosphere bacterial strains  
951 assessed by phenotype microarray measurement for 94 nitrogen sources and EnsembleFBA  
952 prediction for 81 nitrogen sources.

953  
954 Supplementary Table S2: Assessment of concordance between EnsembleFBA predictions and  
955 experimental measurements of nitrogen substrate utilisation across three rhizosphere bacterial  
956 strains.

957  
958 Supplementary Table S3: Growth curve metrics for three bacterial strains cultivated on five  
959 nitrogen substrates.

960

961 Supplementary Table S4: Protein abundance information acquired from label-free proteomic  
962 profiling of three rhizosphere bacterial strains cultivated on five nitrogen sources.

963  
964 Supplementary Table S5: Protein abundance values mapped to KEGG Orthologues for three  
965 rhizosphere bacterial strains cultivated on five nitrogen sources.

966  
967 Supplementary Table S6: Determination of KEGG pathways with differentially expressed  
968 proteins calculated via Fisher's exact test of protein abundance values.

969  
970 Supplementary Tables S7-S8: Metabolic model parameters for *Pseudomonas* sp. *Root9* generated  
971 by KBase.

972  
973 Supplementary Tables S9-S10: Metabolic model parameters for *Streptomyces* sp. *Root66D1*  
974 generated by KBase.

975  
976 Supplementary Tables S11-S12: Metabolic model parameters for *Rhizobium* sp. *Root491*  
977 generated by KBase.

978  
979 Supplementary Table S13: Biomass components used for models generated by EnsembleFBA,  
980 taken from Biggs and Papin (2017).

981  
982 Supplementary Table S14: Determination of proteins that are correlated to the PII component of  
983 the nitrogen stress response in three rhizosphere bacterial strains cultivated on five nitrogen  
984 sources.



985

986 Supplementary Table S15: Summary of key results obtained regarding nitrogen metabolism in

987 the three rhizosphere bacterial strains studied.

988

989 Table 1:

|                                                                                                                  | <i>Pseudomonas</i><br>sp. <i>Root9</i> | <i>Streptomyces</i><br>sp. <i>Root66D1</i> | <i>Rhizobium</i><br>sp. <i>Root491</i> |
|------------------------------------------------------------------------------------------------------------------|----------------------------------------|--------------------------------------------|----------------------------------------|
| Proteins encoded in genome                                                                                       | 5871                                   | 6744                                       | 5225                                   |
| Proteins observed in any treatment (n≥3)                                                                         | 3117                                   | 2552                                       | 3358                                   |
| Proteins observed in all five treatments (n≥3) , abundance significant between any 2 (log2FC>1, BH p-value<0.05) | 712                                    | 346                                        | 238                                    |
| Proteins observed in ≥1 treatment (n≥3), but undetected in ≥1 other treatment (n=0)                              | 548                                    | 168                                        | 397                                    |

990

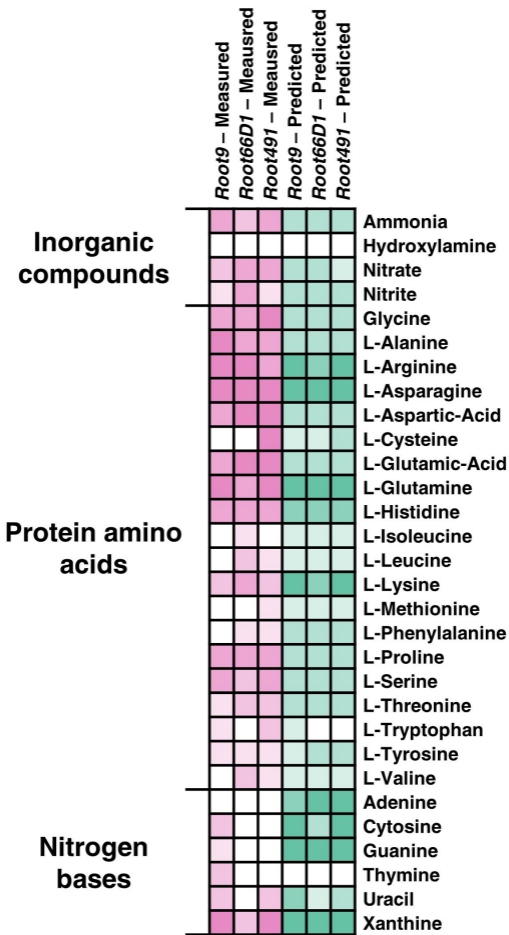

**Measured metabolic activity  
(Phenotype microarray)**

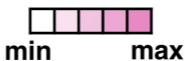

**Predicted metabolic activity  
(Ensemble FBA)**

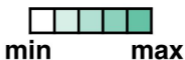

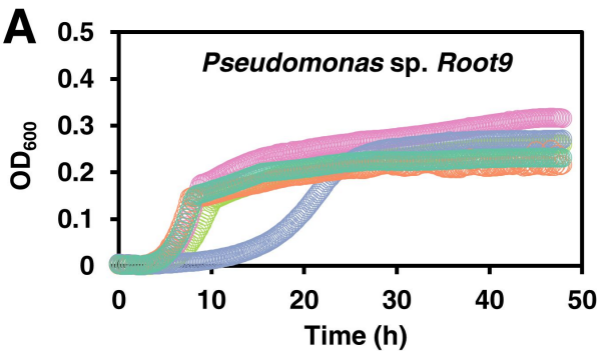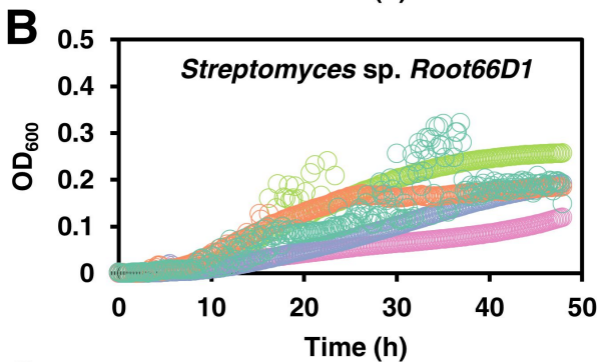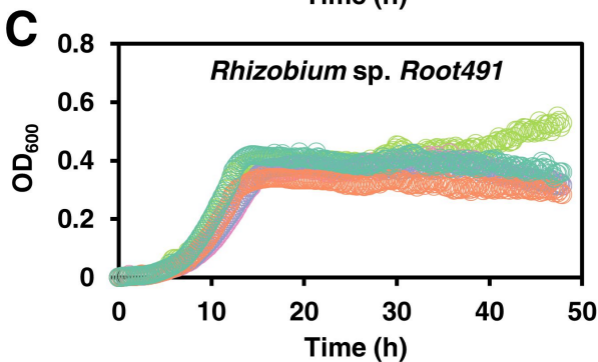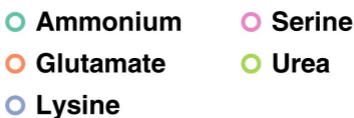

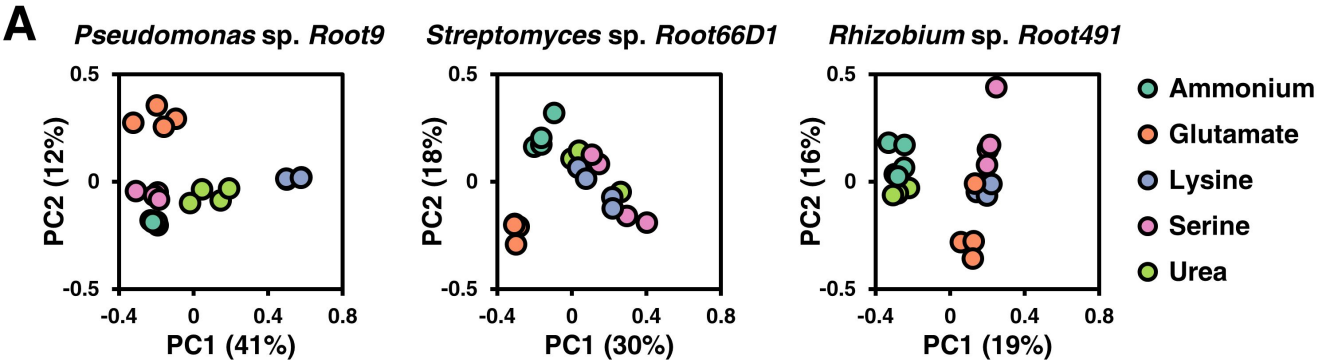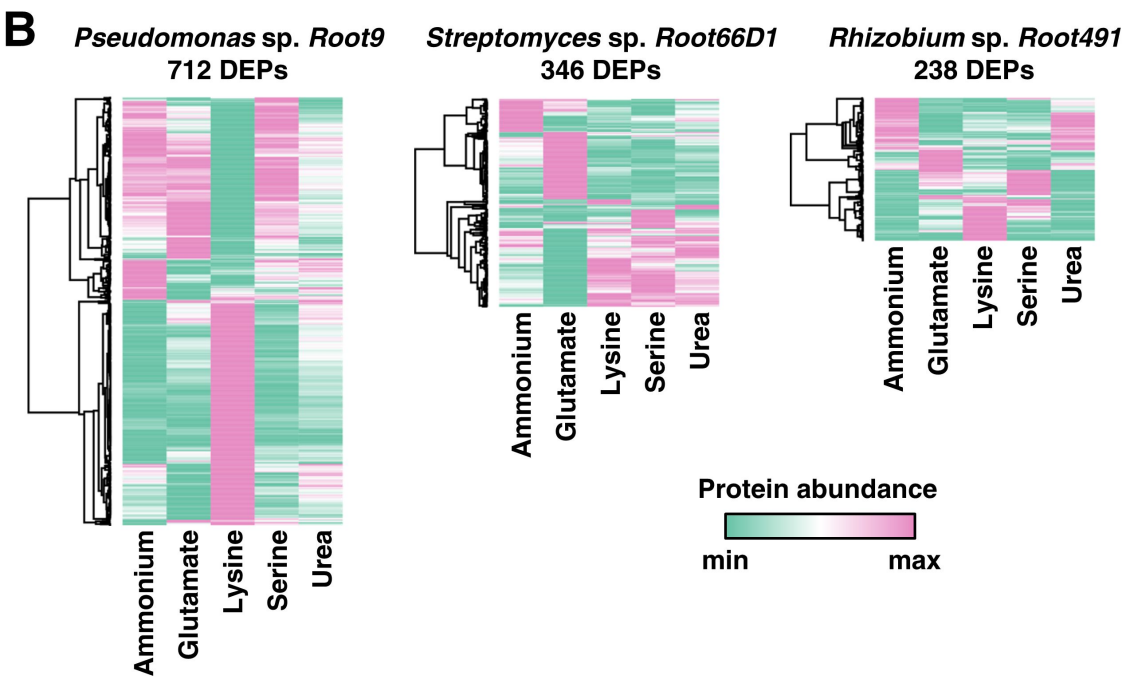

**A**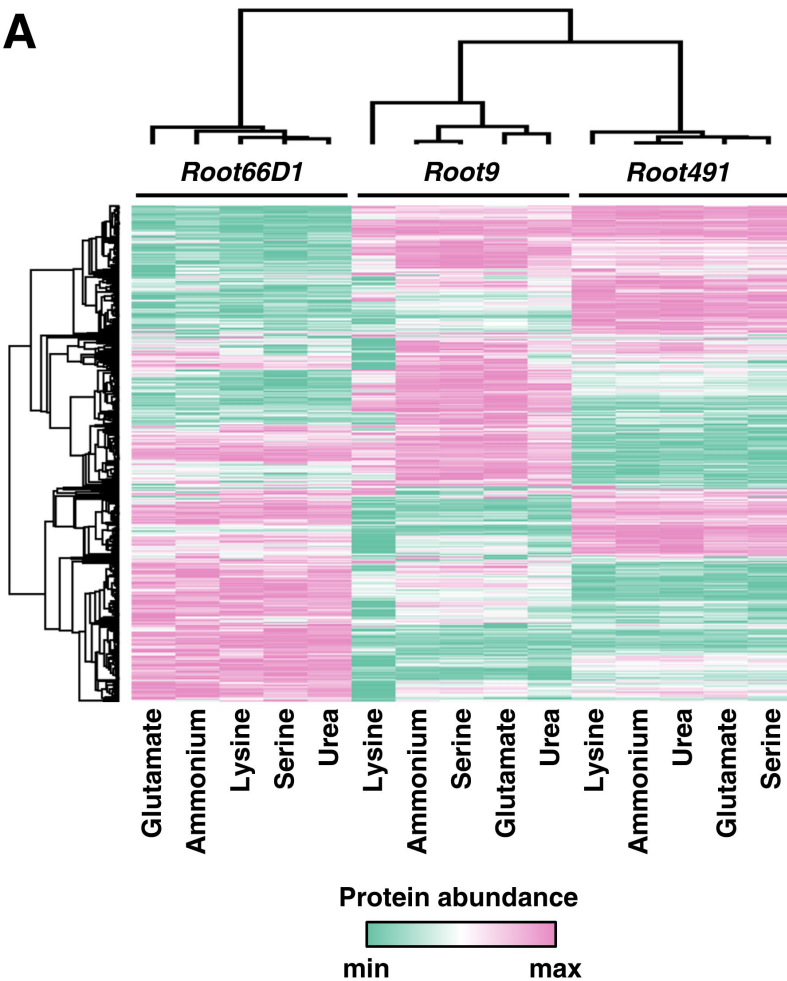**B**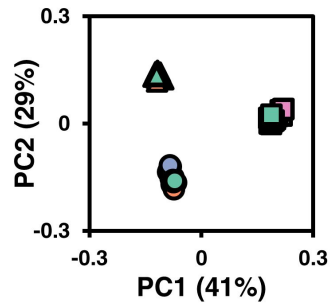**C**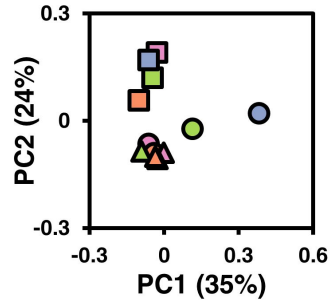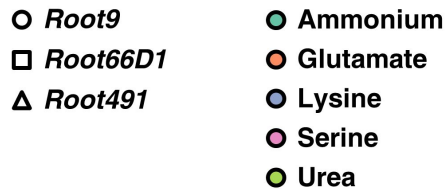

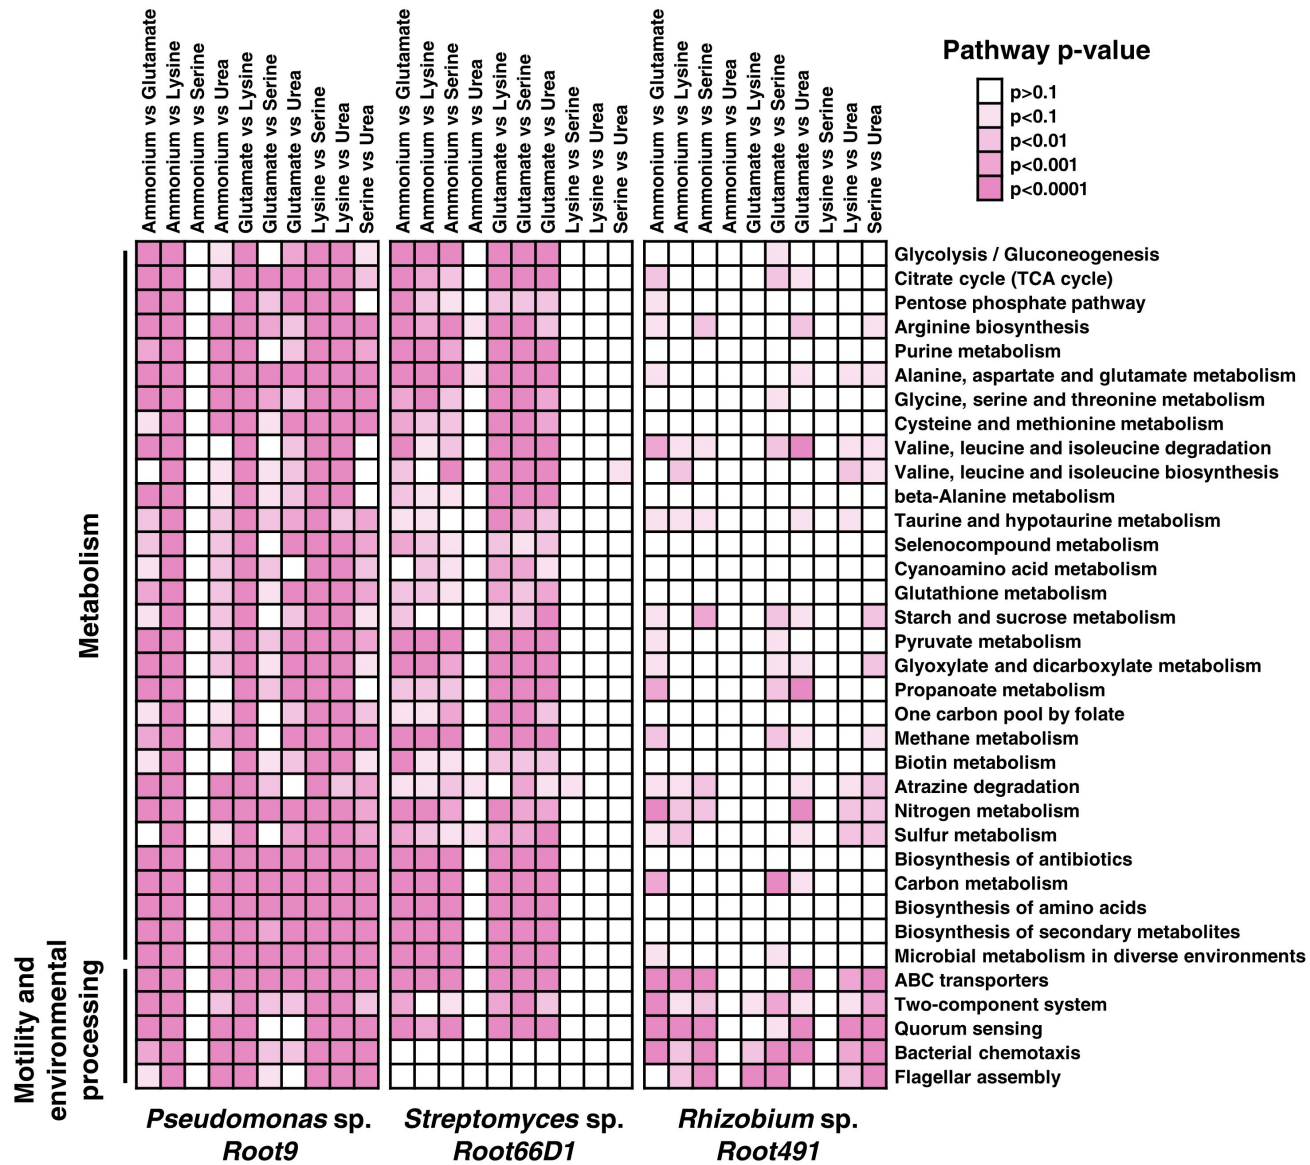

Jacoby et al, Figure 5

**A** *Pseudomonas* sp. Root9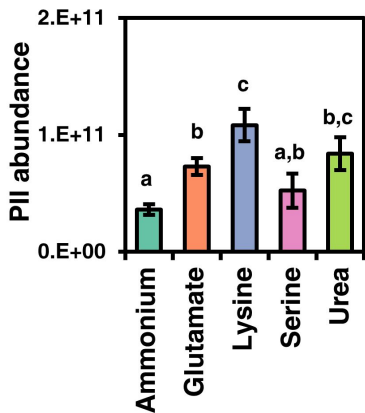*Streptomyces* sp. Root66D1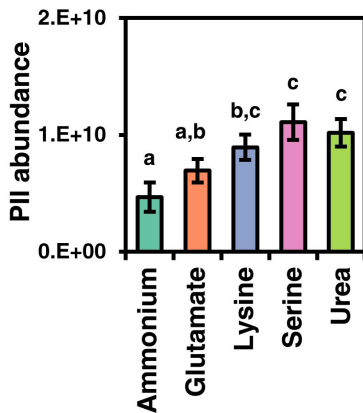*Rhizobium* sp. Root491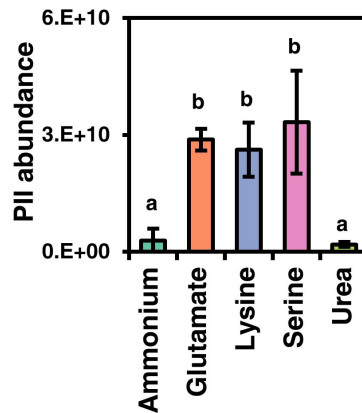**B** *Pseudomonas* sp. Root9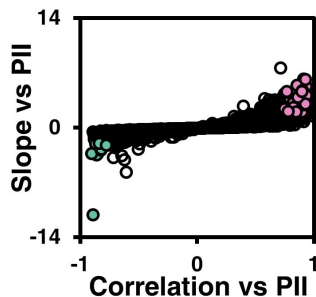*Streptomyces* sp. Root66D1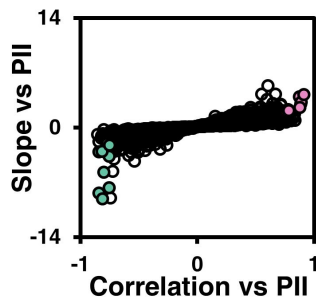*Rhizobium* sp. Root491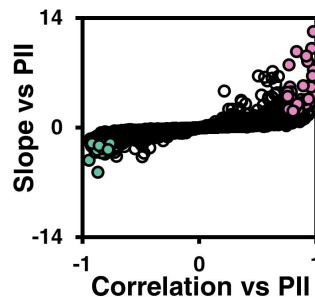

- Protein negatively correlated to PII
- Protein uncorrelated to PII
- Protein positively correlated to PII
